# Supplementary material for: Ca2GeB2O7 and Ca1.78Cd0.22GeB2O7: two acentric borogermanates with a melilite-like structure and short ultraviolet cutoff edge
Source: Royal Society of Chemistry journal article supplement (doi:10.1039/c9qi00678h), 2019-01-01
Supplement: c9qi00678h1.pdf [file c9qi00678h1.pdf]

## Supporting Information

### **Ca<sub>2</sub>GeB<sub>2</sub>O<sub>7</sub> and Ca<sub>1.78</sub>Cd<sub>0.22</sub>GeB<sub>2</sub>O<sub>7</sub>: Two Acentric Borogermanates with Melilite-like Structure and Short Ultraviolet Cutoff Edge**

Ru-Ling Tang,<sup>a,b,c</sup> Chun-Li Hu,<sup>a</sup> Bao-Lin Wu<sup>a,b,c</sup> Yan Chen,<sup>a,b,c</sup> and Jiang-Gao Mao<sup>\*a</sup>

Table 1. Selected bond lengths [Å] and angles [deg.] for Ca<sub>2</sub>GeB<sub>2</sub>O<sub>7</sub> and Ca<sub>1.78</sub>Cd<sub>0.22</sub>GeB<sub>2</sub>O<sub>7</sub>.

|                      |            |                      |            |
|----------------------|------------|----------------------|------------|
| Ca(1)-O(1)           | 2.349(7)   | Ca(1)-O(1)           | 2.333(2)   |
| Ca(1)-O(2)#7         | 2.361(5)   | Ca(1)-O(3)#1         | 2.3453(16) |
| Ca(1)-O(2)#8         | 2.361(5)   | Ca(1)-O(3)#2         | 2.3453(16) |
| Ca(1)-O(3)           | 2.376(7)   | Ca(1)-O(2)           | 2.382(2)   |
| Ca(1)-O(3)#5         | 2.526(5)   | Ca(1)-O(2)#1         | 2.5061(17) |
| Ca(1)-O(3)#9         | 2.526(5)   | Ca(1)-O(2)#3         | 2.5061(17) |
| Ca(1)-O(2)           | 2.543(5)   | Ca(1)-O(3)#4         | 2.5405(16) |
| Ca(1)-O(2)#10        | 2.543(5)   | Ca(1)-O(3)#5         | 2.5405(16) |
| Ge(1)-O(2)#1         | 1.748(5)   | Ge(1)-O(3)#8         | 1.7482(16) |
| Ge(1)-O(2)#2         | 1.748(5)   | Ge(1)-O(3)#9         | 1.7482(16) |
| Ge(1)-O(2)#3         | 1.748(5)   | Ge(1)-O(3)#5         | 1.7482(16) |
| Ge(1)-O(2)           | 1.748(5)   | Ge(1)-O(3)           | 1.7482(16) |
| B(1)-O(3)#12         | 1.391(13)  | B(1)-O(2)#9          | 1.380(4)   |
| B(1)-O(1)#13         | 1.450(12)  | B(1)-O(1)#13         | 1.462(3)   |
| B(1)-O(2)#8          | 1.586(8)   | B(1)-O(3)#14         | 1.576(3)   |
| B(1)-O(2)#7          | 1.586(8)   | B(1)-O(3)            | 1.576(3)   |
| O(2)#1-Ge(1)-O(2)#2  | 107.98(16) | O(3)#8-Ge(1)-O(3)#9  | 112.42(10) |
| O(2)#1-Ge(1)-O(2)#3  | 112.5(3)   | O(3)#8-Ge(1)-O(3)#5  | 108.02(5)  |
| O(2)#2-Ge(1)-O(2)#3  | 107.98(16) | O(3)#9-Ge(1)-O(3)#5  | 108.02(5)  |
| O(2)#1-Ge(1)-O(2)    | 107.98(16) | O(3)#8-Ge(1)-O(3)    | 108.02(5)  |
| O(2)#2-Ge(1)-O(2)    | 112.5(3)   | O(3)#9-Ge(1)-O(3)    | 108.02(5)  |
| O(2)#3-Ge(1)-O(2)    | 107.98(16) | O(3)#5-Ge(1)-O(3)    | 112.42(10) |
| O(3)#12-B(1)-O(1)#13 | 119.0(9)   | O(2)#9-B(1)-O(1)#13  | 118.5(3)   |
| O(3)#12-B(1)-O(2)#8  | 115.2(6)   | O(2)#9-B(1)-O(3)#14  | 115.92(17) |
| O(1)#13-B(1)-O(2)#8  | 102.3(6)   | O(1)#13-B(1)-O(3)#14 | 101.95(17) |
| O(3)#12-B(1)-O(2)#7  | 115.2(6)   | O(2)#9-B(1)-O(3)     | 115.92(17) |
| O(1)#13-B(1)-O(2)#7  | 102.3(6)   | O(1)#13-B(1)-O(3)    | 101.95(17) |
| O(2)#8-B(1)-O(2)#7   | 100.2(7)   | O(3)#14-B(1)-O(3)    | 99.8(2)    |

Symmetry transformations used to generate equivalent atoms:

#1 -y, x, -z #2 -x, -y, z #3 y, -x, -z #4 x, y, z-1 #5 y, -x, -z+1 #6 -x, -y, z-1 #7 -y, x, -z+1 #8 -x-1/2, y-1/2, -z+1  
 #9 -y-1, x, -z+1 #10 -y-1/2, -x-1/2, z #11 -x-1, -y, z #12 x, y, z+1 #13 y, -x-1, -z+1

Table S3. Atomic coordinates ( $\times 10^4$ ), equivalent isotropic displacement parameters ( $\text{\AA}^2 \times 10^3$ ) and bond valence sums (BVS) for  $\text{Ca}_2\text{GeB}_2\text{O}_7$  and  $\text{Ca}_{1.78}\text{Cd}_{0.22}\text{GeB}_2\text{O}_7$ .

| Atom  | x        | y        | z        | Wyckoff | Occupancy | U(eq) | BVS   |
|-------|----------|----------|----------|---------|-----------|-------|-------|
| Ca(1) | 3394(2)  | 1606(2)  | 5085(4)  | 4e      | 1         | 9(1)  | 2.241 |
| Ge(1) | 0        | 0        | 0        | 2a      | 1         | 9(1)  | 4.000 |
| B(1)  | 1303(11) | 3697(11) | 9550(20) | 4e      | 1         | 11(2) | 2.874 |
| O(1)  | 5000     | 0        | 1620(20) | 2c      | 1         | 10(2) | 2.328 |
| O(2)  | 1844(7)  | 784(7)   | 2014(11) | 4e      | 1         | 11(1) | 1.721 |
| O(3)  | 1448(7)  | 3552(7)  | 2415(14) | 8f      | 1         | 13(2) | 1.981 |
|       |          |          |          |         |           |       |       |
| Ca(1) | 3406(1)  | 1594(1)  | -101(1)  | 4e      | 0.889     | 2(1)  |       |
| Cd(1) | 3406(1)  | 1594(1)  | -101(1)  | 4e      | 0.111     | 2(1)  |       |
| Ge(1) | 0        | 0        | 5000     | 2a      | 1         | 1(1)  |       |
| B(1)  | 3682(3)  | 1318(3)  | 4555(7)  | 4e      | 1         | 1(1)  |       |
| O(1)  | 5000     | 0        | 3373(6)  | 2c      | 1         | 3(1)  |       |
| O(2)  | 1844(2)  | 798(2)   | 2977(3)  | 4e      | 1         | 4(1)  |       |
| O(3)  | 1449(2)  | 3551(2)  | 2588(5)  | 8f      | 1         | 3(1)  |       |
